# Supplementary material
Source: PubMed Central journal article supplement (PMC3074971)
Supplement: NIHMS282380-supplement-1_si_001.pdf [file NIHMS282380-supplement-1_si_001.pdf]

## Supporting Information

# A Computational Evaluation of the Mechanism of Penicillin-Binding Protein Catalyzed Cross-linking of the Bacterial Cell Wall

Qicun Shi, Samy O. Meroueh, Jed F. Fisher, and Shahriar Mobashery\*

*Contribution from the Department of Chemistry and Biochemistry,*

*University of Notre Dame, Notre Dame, IN 46556*

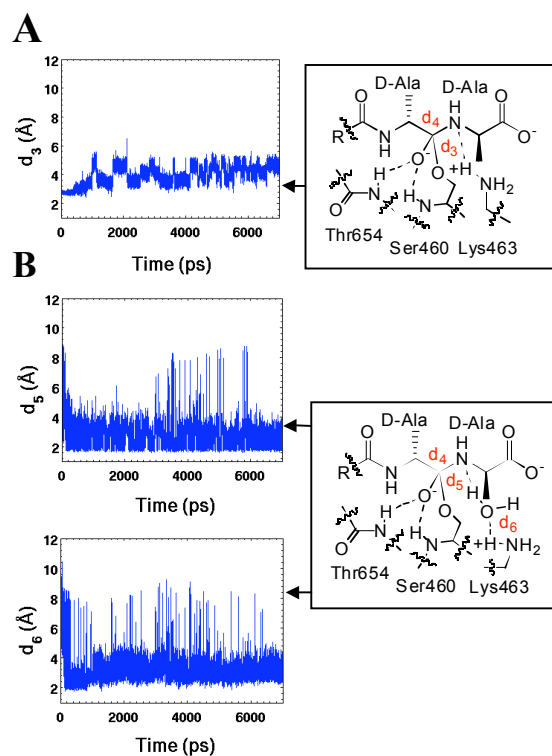

**Figure S1.** Distances collected from MD sampling simulation, over 7.8 ns, evaluating (A) direct proton transfer ( $d_3$ ) from Lys463 and (B) water-mediated proton transfer route with dual transfers ( $d_5$  and  $d_6$ ). Distances (Å) are the separation between amide N and carbonyl C for  $d_4$ ; between the amide N and water H for  $d_5$ ; and between the water O and one of the hydrogens of Lys463 for  $d_6$ .

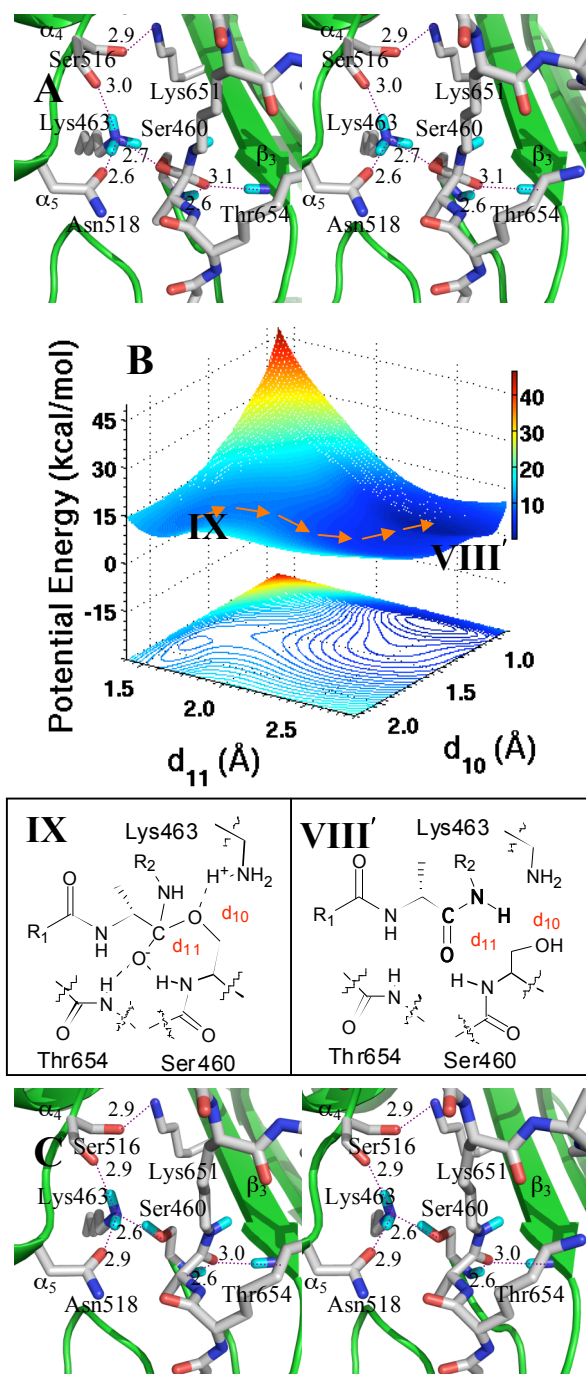

**Figure S2.** (A) The tetrahedral species (IX) resulting from L-Lys H proton transfer to Lys463. Hydrogen bonds are shown as dashed lines (distances in Å between heteroatoms). The tetrahedral species is nestled between  $\beta_3$  sheet and the loop connecting the  $\alpha_4$  and  $\alpha_5$  helices. Important active site residues and the tetrahedral species are in capped-stick (C, gray; N, blue; O, red; H, cyan). Distances (Å) are rounded to the nearest tenth. (B) QM/MM potential energy surface and the contour over reaction coordinates represented as a shadow. The reaction path from the tetrahedral species (IX) to the enzyme-product (VIII') is shown with orange arrows. (C) The conformation of the product (VIII') resulting from proton transfer from protonated Lys463 to the ester oxygen with collapse of the tetrahedral.

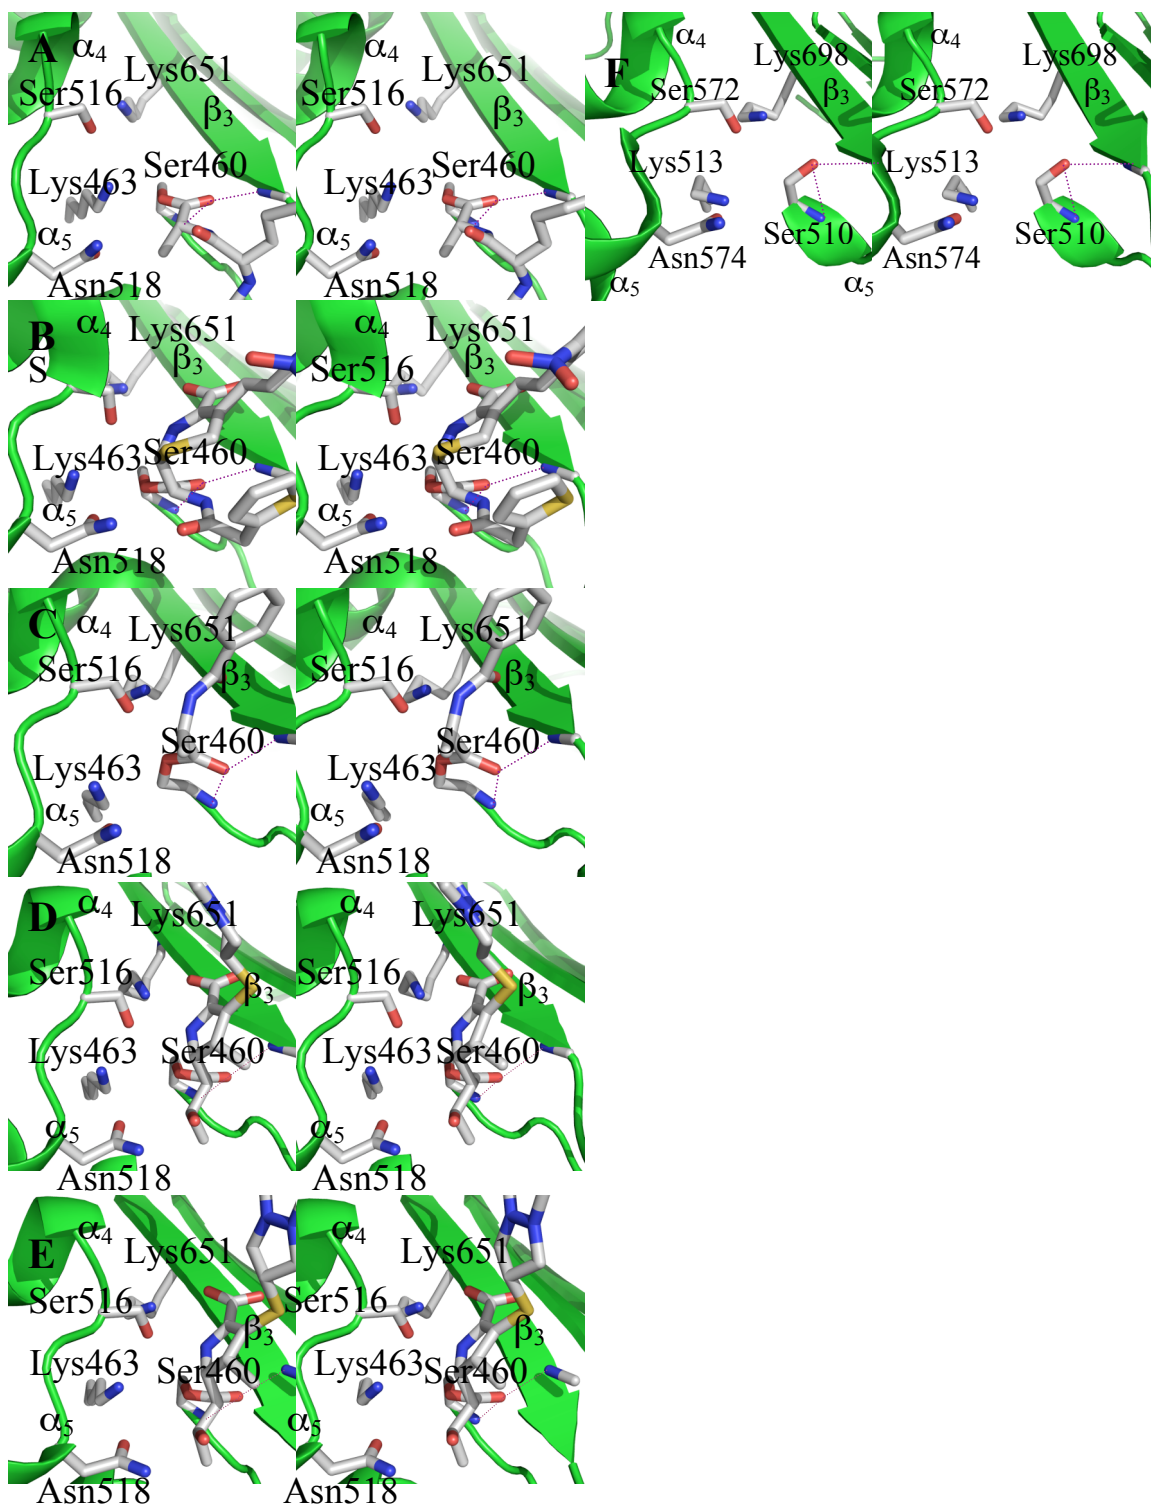

**Figure S3.** Comparison of the PBP 1b acyl-enzyme from the ONIOM QM/MM calculations (A) and the x-ray structures of PBP 1b complexed with nitrocefim (B); *N*-Benzoyl-D-alanylmercaptoacetic acid thioester (C); PBP 1a complexed with biapenem (D); PBP 2x complexed with biapenem (E); and PBP 6 of *E. coli* (F). The acyl-enzyme intermediates are nestled between  $\beta_3$  sheet and the loop connecting  $\alpha_4$  and  $\alpha_5$  helices. Important active site residues and the tetrahedral portion are represented in capped-sticks. Two hydrogen bonds (magenta) in the oxyanion hole are shown as dashed lines.

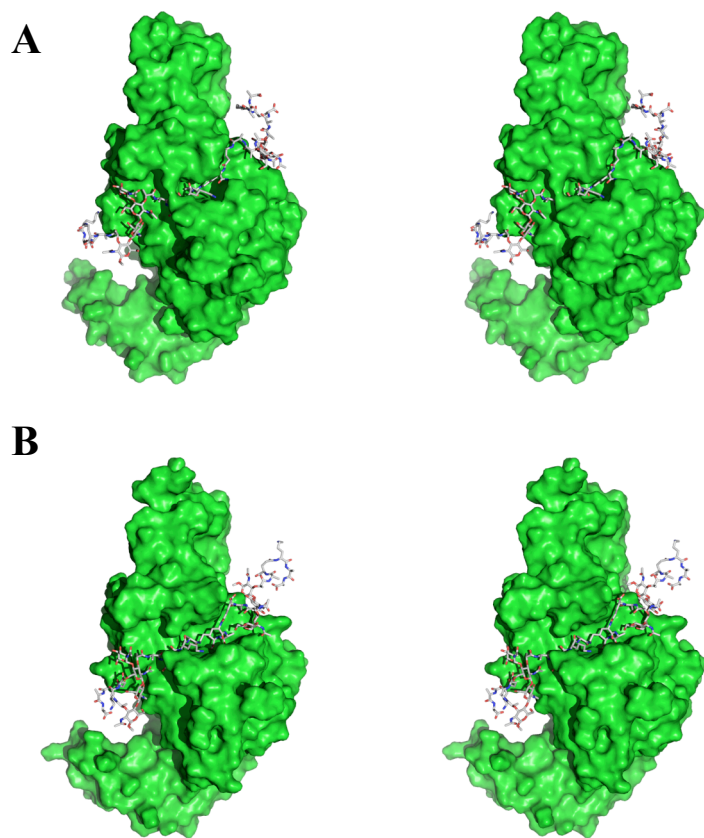

**Figure S4.** Two snapshots, taken from a 10 ns molecular dynamics simulation of the acyl-enzyme-peptidoglycan acceptor complex, illustrating the closed cleft (A) and the open cleft (B) states.

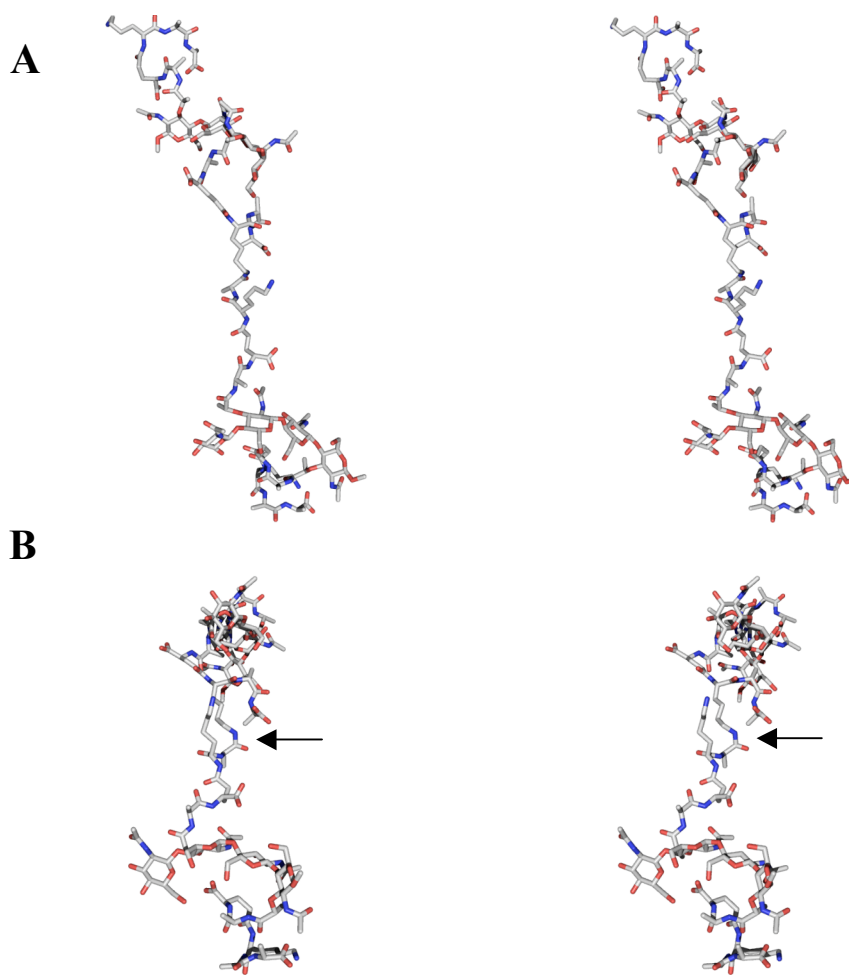

**Figure S5.** Panel A shows the cross-linked peptidoglycan structure as excised from (and showing the same orientation as is depicted in) **Figure 1E**. In the perspective of Panel A the atoms of the *cis*-amide  $\rightarrow$ -D-Ala-L-Lys crosslink are approximately in the orthogonal plane of the paper. Rotation of Panel A by 90° gives Panel B. The *cis*-amide is seen clearly (arrow).

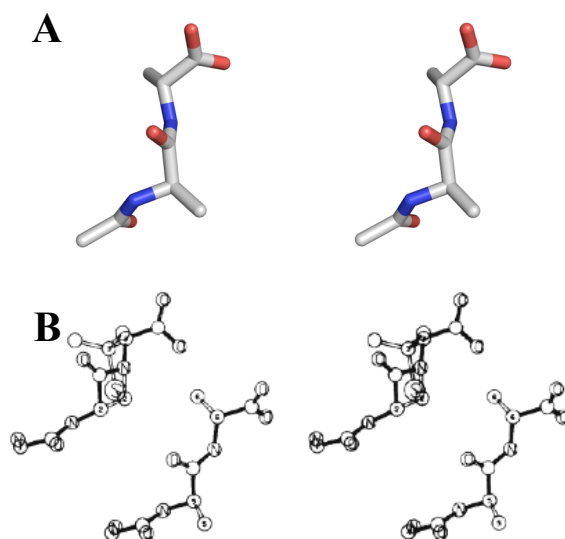

**Figure S6.** (A) Stereostructure of the conformation of the *N*-acyl-D-Ala-D-Ala stem terminus in the PBP 1b-substrate Michaelis complex. (B) Stereostructures of a tetrahedral-like *N*-acyl-D-Ala-D-Ala conformation (lower right structure of Panel B) spatially matched to a penicillin (upper left structure of Panel B). Panel B is taken from Lee, B. *J. Mol Biol.* **1971**, *61*, 463–469. The spatial concurrence of the -D-Ala-D-Ala conformation in Panel A compared to the lower right conformation in Panel B is very close.
